# Supplementary material for: The structure–self-assembly relationship in PDMAEMA/polyester miktoarm stars
Source: Royal Society of Chemistry journal article supplement (doi:10.1039/d2py00644h), 2022-01-01
Supplement: d2py00644h1.pdf [file d2py00644h1.pdf]

## The Structure-Self-Assembly Relationship in PDMAEMA/Polyester

### Miktoarm Stars

Anna Mielańczyk<sup>1,\*</sup>, Maria Kupczak<sup>1</sup>, Olesya Klymenko<sup>2</sup>, Łukasz Mielańczyk<sup>2,3</sup>, Sebastian Arabasz<sup>4</sup>, Krystian Madej<sup>1</sup> and Dorota Neugebauer<sup>1</sup>

<sup>1</sup> *Department of Physical Chemistry and Technology of Polymers, Faculty of Chemistry, Silesian University of Technology, M. Strzody 9, 44-100, Gliwice, Poland*

<sup>2</sup> *Department of Histology and Cell Pathology School of Medicine with the Division of Dentistry in Zabrze, Medical University of Silesia, Jordana 19 Street, 41-808, Zabrze, Poland*

<sup>3</sup> *Silesian Nanomicroscopy Center in Zabrze, Silesia LabMed – Research and Implementation Centre, Medical University of Silesia*

<sup>4</sup> *Łukasiewicz Research NETWORK – PORT Polish Center for Technology Development, 147 Stablowicka St, 54-066, Wrocław, Poland*

\* corresponding author e-mail: [anna.mielanczyk@polsl.pl](mailto:anna.mielanczyk@polsl.pl)

#### Table of content

|                                                                                        |           |
|----------------------------------------------------------------------------------------|-----------|
| <b>1. Characterization of linear polymers .....</b>                                    | <b>2</b>  |
| <b>2. Characterization of miktoarm star-shaped polymers and their precursors .....</b> | <b>4</b>  |
| <b>3. Literature .....</b>                                                             | <b>15</b> |

## 1. Characterization of linear polymers

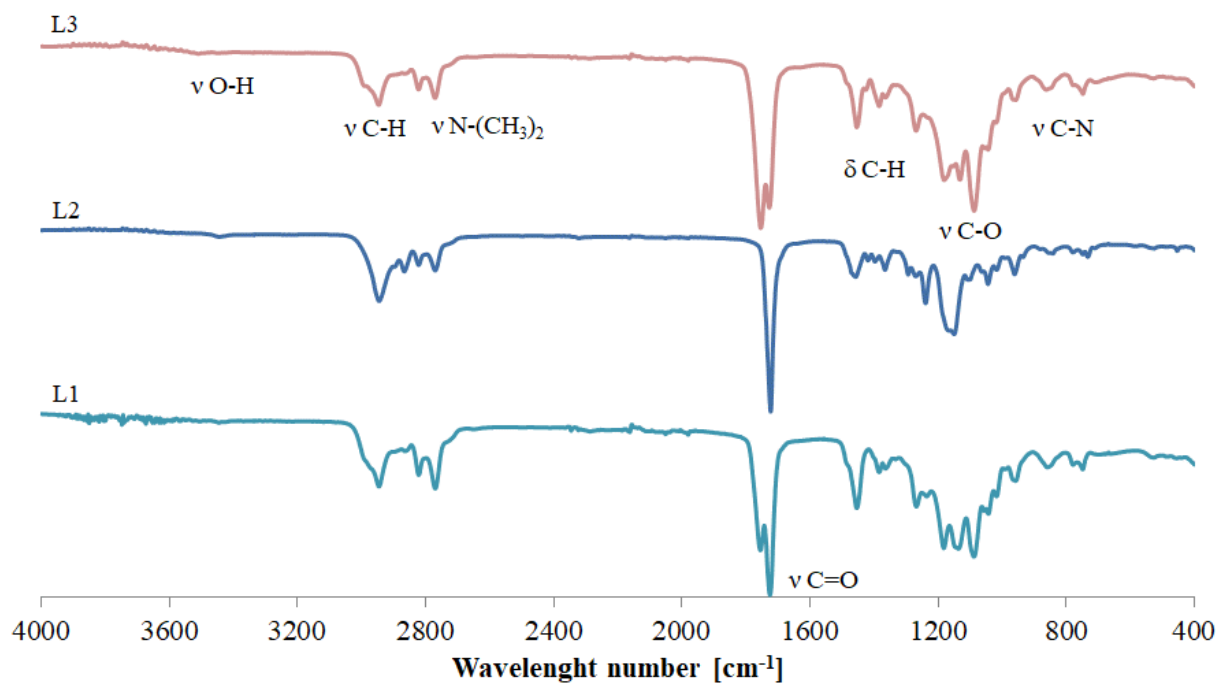

**Figure S1.** ATR-IR spectra of linear copolymers

**Table S1.** Characterization of linear MI

|     | DP <sub>CL</sub> | DP <sub>LA</sub> | DP <sub>GA</sub> | M <sub>n, calc</sub> | M <sub>n, SEC</sub> <sup>c</sup> | Đ <sup>c</sup> |
|-----|------------------|------------------|------------------|----------------------|----------------------------------|----------------|
| MI1 | -                | 112              | -                | 8 100 <sup>b</sup>   | 11 200                           | 1.24           |
| MI2 | 93               | -                | -                | 10 600 <sup>b</sup>  | 21 100                           | 1.38           |
| MI3 | -                | 84               | 30               | 7 800 <sup>b</sup>   | 8 500                            | 1.51           |
| MI4 | 17               | 94               | 24               | 10 100 <sup>b</sup>  | 15 000                           | 1.55           |

a – calculated from GC chromatograms, b – calculated from <sup>1</sup>H NMR spectra, c – THF as an eluent and PS standards.

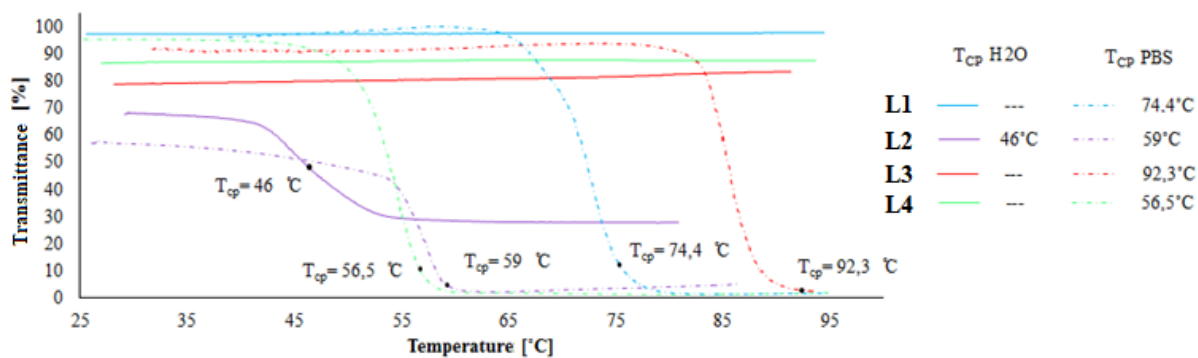

**Figure S2.** The plots of transmittance vs temperature for linear copolymers.

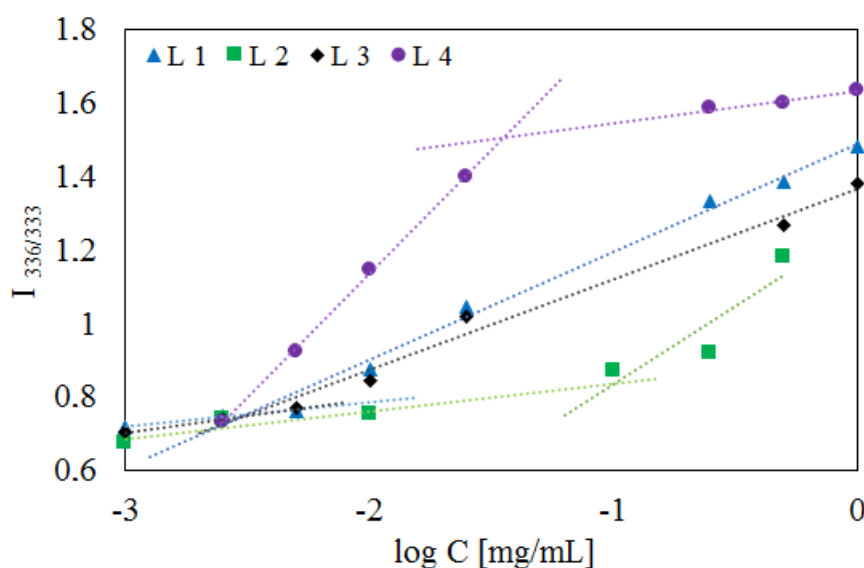

**Figure S3.** Plot of intensity versus logC for linear polymers

**Table S2.** Characterization of linear polymers via measurement of  $D_h$  in deionized water

| Deionized H <sub>2</sub> O |              |      |                       |      |               |
|----------------------------|--------------|------|-----------------------|------|---------------|
| No.                        | $D_h$ , 25°C | PdI  | $D_h$ , $T_{CP}$ [°C] | PdI  | $T_{CP}$ [°C] |
| L1                         | 257          | 0.53 | -                     | -    | x             |
| L2                         | 294          | 0.35 | 275                   | 0.36 | 46            |
| L3                         | 480          | 0.53 | -                     | -    | x             |
| L4                         | 169          | 0.28 | -                     | -    | x             |

Where: x –soluble in water but lack of  $T_{CP}$ , thus  $D_h$  at  $T_{CP}$  was not measured

**Table S3.** Characterization of linear polymers via measurement of  $D_h$  in 0.01M PBS (pH 7.4)

| 0.01M PBS, pH 7.4 |              |      |                       |      |               |
|-------------------|--------------|------|-----------------------|------|---------------|
| No.               | $D_h$ , 25°C | PdI  | $D_h$ , $T_{CP}$ [°C] | PdI  | $T_{CP}$ [°C] |
| L1                | 750          | 0.55 | 266                   | 0.10 | 74            |
| L2                | 399          | 0.38 | 699                   | 1.00 | 59            |
| L3                | 885          | 0.51 | -                     | -    | x             |
| L4                | 657          | 0.92 | 190                   | 0.29 | 57            |

Where: x –soluble in water but lack of  $T_{CP}$ , thus  $D_h$  at  $T_{CP}$  was not measured

## 2. Characterization of miktoarm star-shaped polymers and their precursors

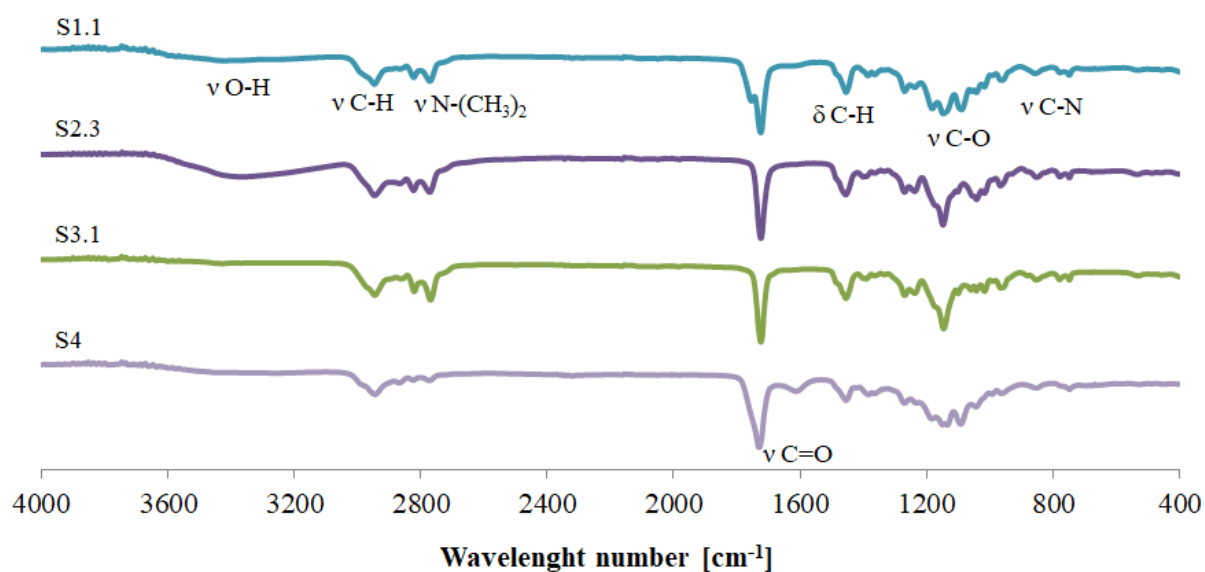

**Figure S4.** ATR-IR spectra of chosen miktopolymers

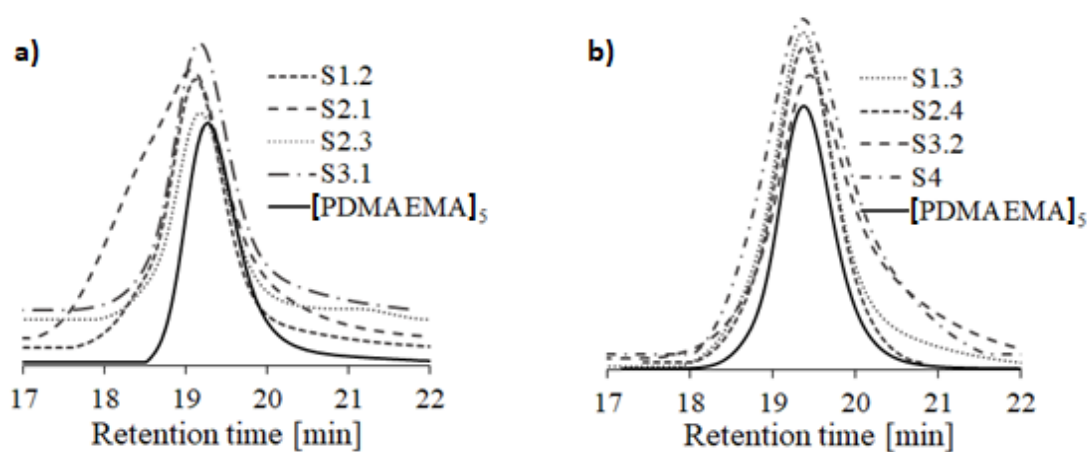

**Figure S5.** SEC traces of miktoarm star-shaped copolymers where  $DP_{\text{DMAEMA}}=160$  (A) and  $DP_{\text{DMAEMA}}=110$  (B).

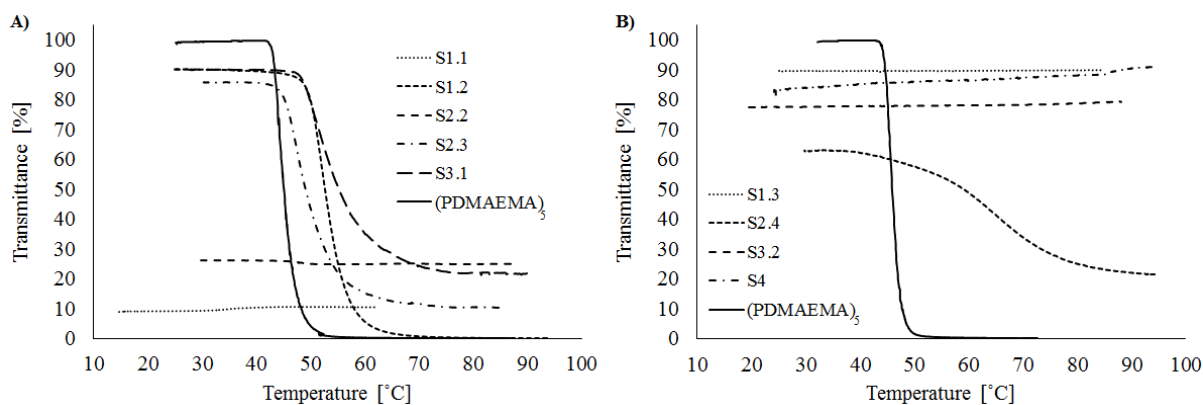

**Figure S6.** Phase transition of star-shaped miktoarm polymers where  $DP_{DMAEMA} = 160$  (A) and with  $DP_{DMAEMA} = 110$  (B), in deionized water

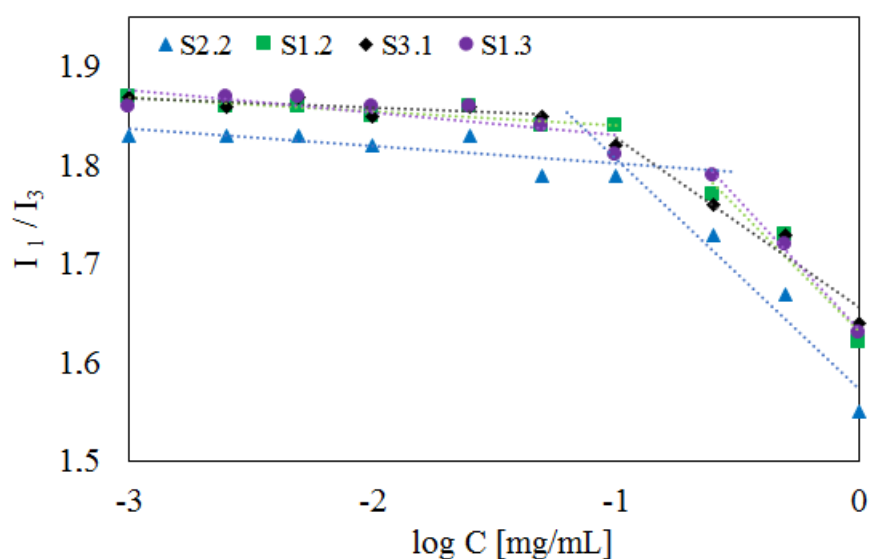

**Figure S7.** Plot of intensity vs  $\log C$  for miktopolymers

**Table S4.** Characterization of polymers used for click reactions

|                | $DP_{DMAEMA}$ | $DP_{CL}$ | $DP_{LA}$ | $DP_{GA}$ | $M_{n, calc}$       | $M_{n, SEC}^c$ | $\bar{D}^c$ |
|----------------|---------------|-----------|-----------|-----------|---------------------|----------------|-------------|
| 5-arm PDMAEMA1 | 160           | -         | -         | -         | 25 154 <sup>a</sup> | 22 500         | 1.28        |
| 5-arm PDMAEMA2 | 110           | -         | -         | -         | 17 293 <sup>a</sup> | 19 500         | 1.14        |
| PLA            | -             | -         | 13        | -         | 937 <sup>b</sup>    | 1 200          | 1.29        |
|                | -             | -         | 135       | -         | 9 729 <sup>b</sup>  | 15 900         | 1.27        |
| PCL            | -             | 15        | -         | -         | 1 712 <sup>b</sup>  | 2 800          | 1.30        |
|                | -             | 68        | -         | -         | 7 762 <sup>b</sup>  | 16 400         | 1.25        |
|                | -             | 115       | -         | -         | 13 126 <sup>b</sup> | 27 700         | 1.61        |
| PLGA           | -             | -         | 10        | 8         | 1 185 <sup>b</sup>  | 9 400          | 1.67        |
| PLGCL          | -             | 96        | 34        | 85        | 18 341 <sup>b</sup> | 14 200         | 1.78        |

Where: a – calculated from GC chromatograms, b – calculated from  $^1H$  NMR spectra, c – THF as an eluent and PS standards.

**Table S5.** Characterization of mikroarm star-shaped polymers via measurement of Dh in deionized water or 0.01M PBS (pH 7.4)

| No          | Polyester | <b>DP<sub>DMAEMA</sub> /</b><br><b>DP<sub>Polyester</sub></b> | <b>F<sub>hydrophilic</sub></b><br><b>[mol%]</b> | <b>D<sub>hr, H2O</sub></b><br><b>25°C</b> | <b>D<sub>hr, H2O</sub> T<sub>CP</sub></b><br><b>[°C]</b> | <b>D<sub>hr, PBS</sub></b><br><b>25°C</b> | <b>D<sub>hr, PBS</sub> T<sub>CP</sub></b><br><b>[°C]</b> |
|-------------|-----------|---------------------------------------------------------------|-------------------------------------------------|-------------------------------------------|----------------------------------------------------------|-------------------------------------------|----------------------------------------------------------|
| <b>S1.1</b> | PLA       | <b>160/135</b>                                                | <b>0.54</b>                                     | <b>208±85</b>                             | <b>252±63</b>                                            | <b>243±90</b>                             | <b>550±92</b>                                            |
| <b>S1.2</b> |           | <b>160/13</b>                                                 | <b>0.92</b>                                     | <b>9±2</b>                                | <b>245±48</b>                                            | <b>12±2</b>                               | <b>347±74</b>                                            |
| S1.3        |           | 110/13                                                        | 0.89                                            | 245±36                                    | n.d.                                                     | 10±1                                      | 420±76                                                   |
| S2.1        | PCL       | 160/115                                                       | 0.42                                            | n.d.                                      | n.d.                                                     | n.d.                                      | n.d.                                                     |
| S2.2        |           | 160/68                                                        | 0.70                                            | 172±92                                    | 217±61                                                   | 113±33                                    | 610±98                                                   |
| S2.3        |           | 160/15                                                        | 0.91                                            | 226±94                                    | 161±61                                                   | 196±151                                   | 702±127                                                  |
| S2.4        |           | 110/15                                                        | 0.88                                            | 104±40                                    | n.d.                                                     | 162±50                                    | 941±163                                                  |
| <b>S3.1</b> | PLGA      | <b>160/10/8</b>                                               | <b>0.90</b>                                     | <b>9±1</b>                                | <b>141±32</b>                                            | <b>8±1</b>                                | <b>437±74</b>                                            |
| S3.2        |           | 110/10/8                                                      | 0.86                                            | 290±190                                   | n.d.                                                     | 337±115                                   | 448±75                                                   |
| S4          | PLGCL     | 110/34/85/96                                                  | 0.34                                            | 64±12                                     | n.d.                                                     | 147±85                                    | 407±70                                                   |

Where: n.d.- not determined; the bold corresponds to the polymers where fractal formation has been observed

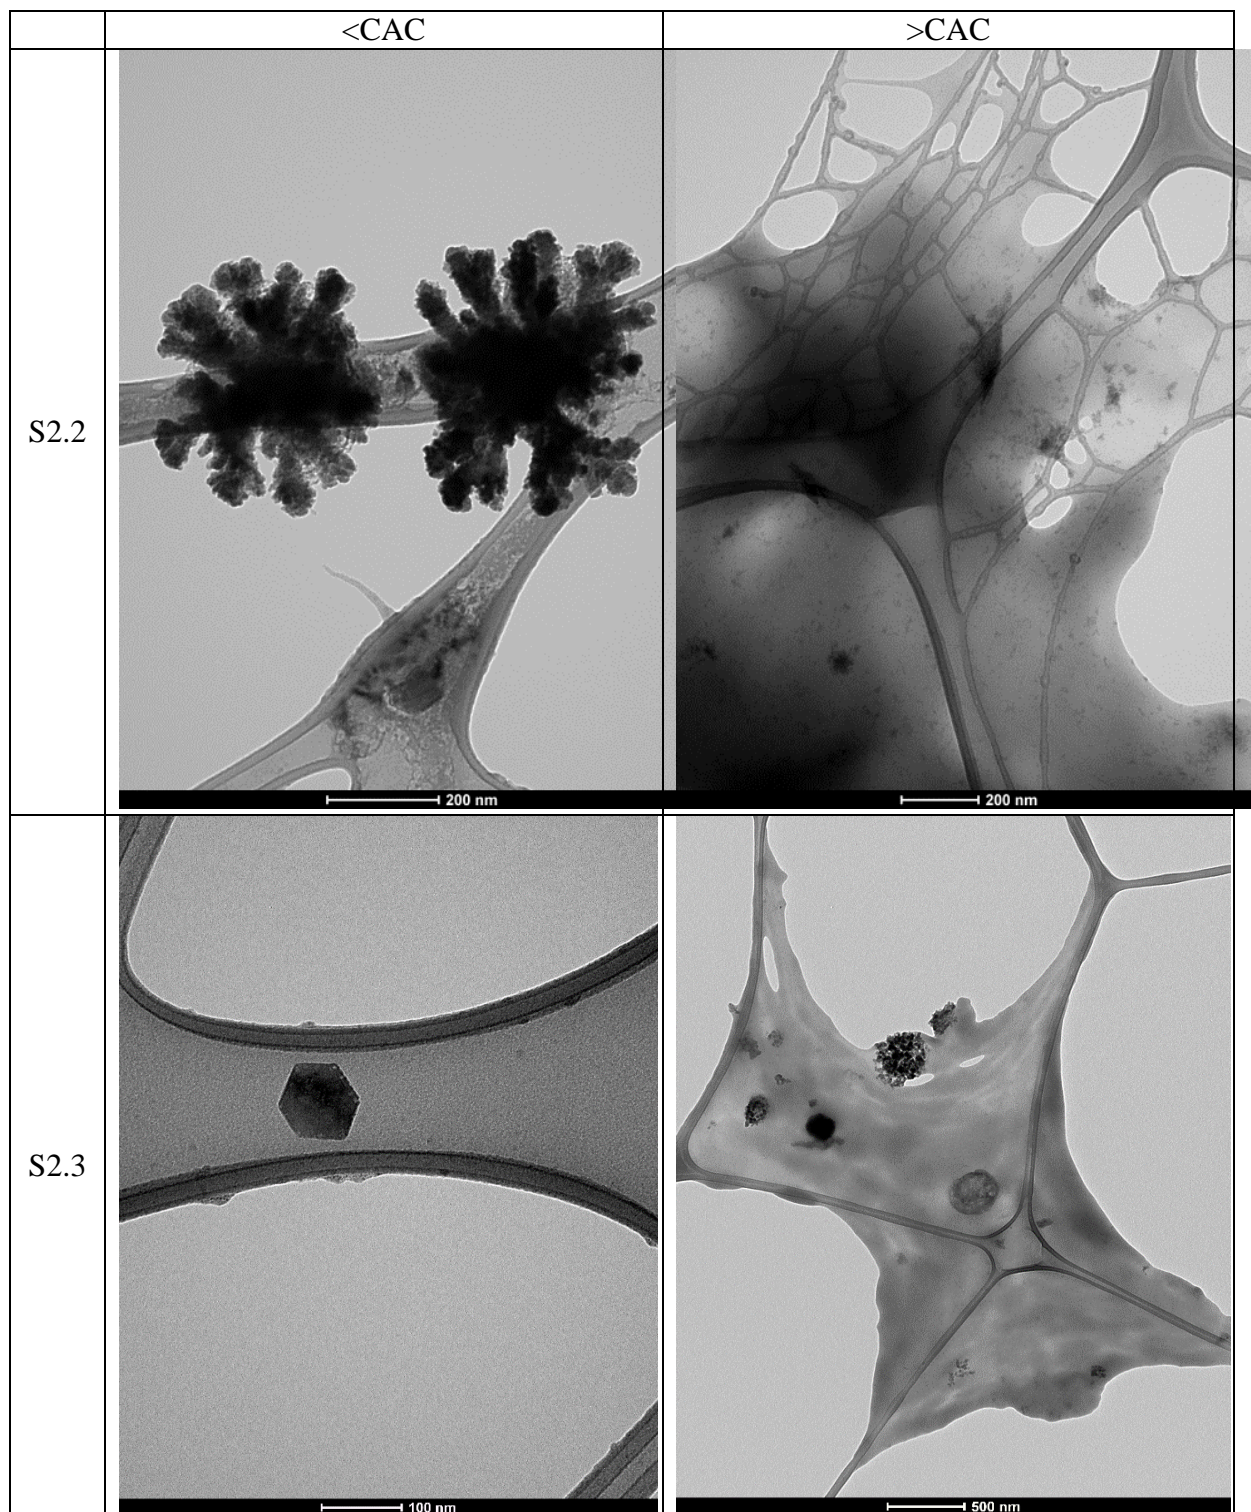

**Figure S8.** TEM images of mikroarm star-shaped polymers with PCL arm.



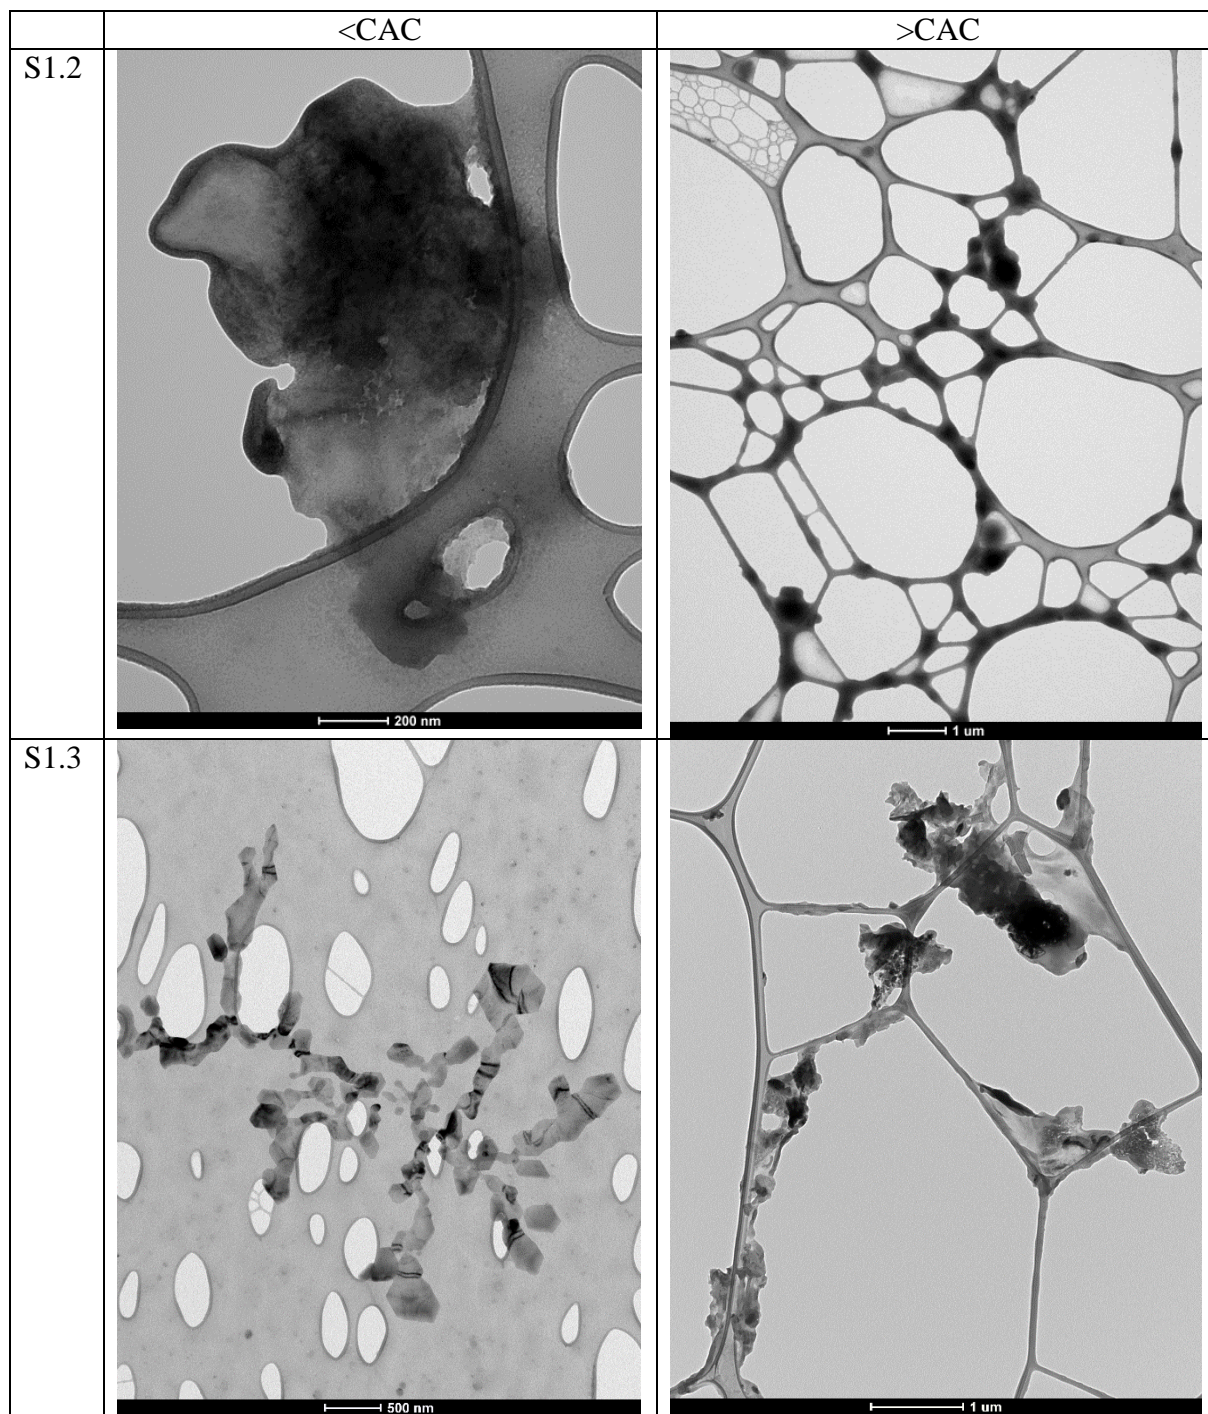

**Figure S9.** TEM images of miktoarm star-shaped polymers with PLA arm.



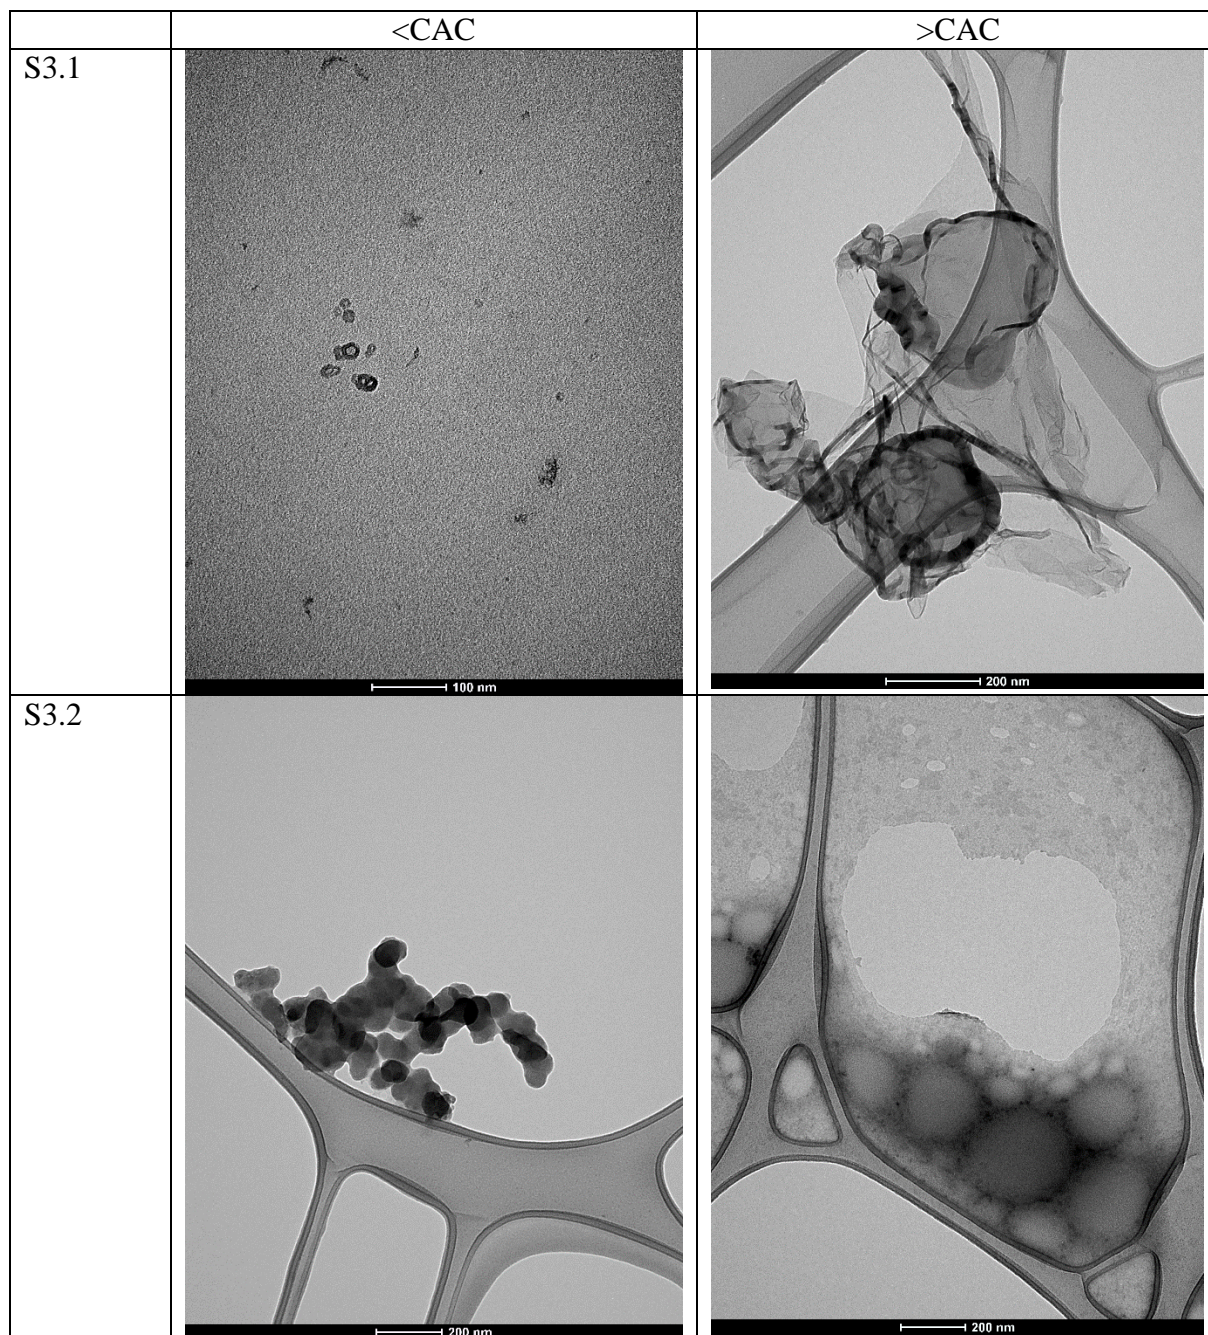

**Figure S10.** TEM images of miktoarm star-shaped polymers with PLGA arm.

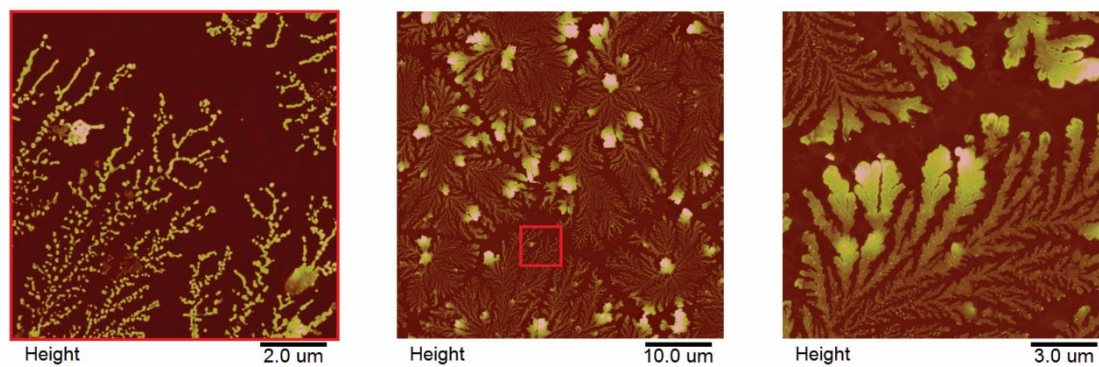

**Figure S11.** AFM images of S1.1.



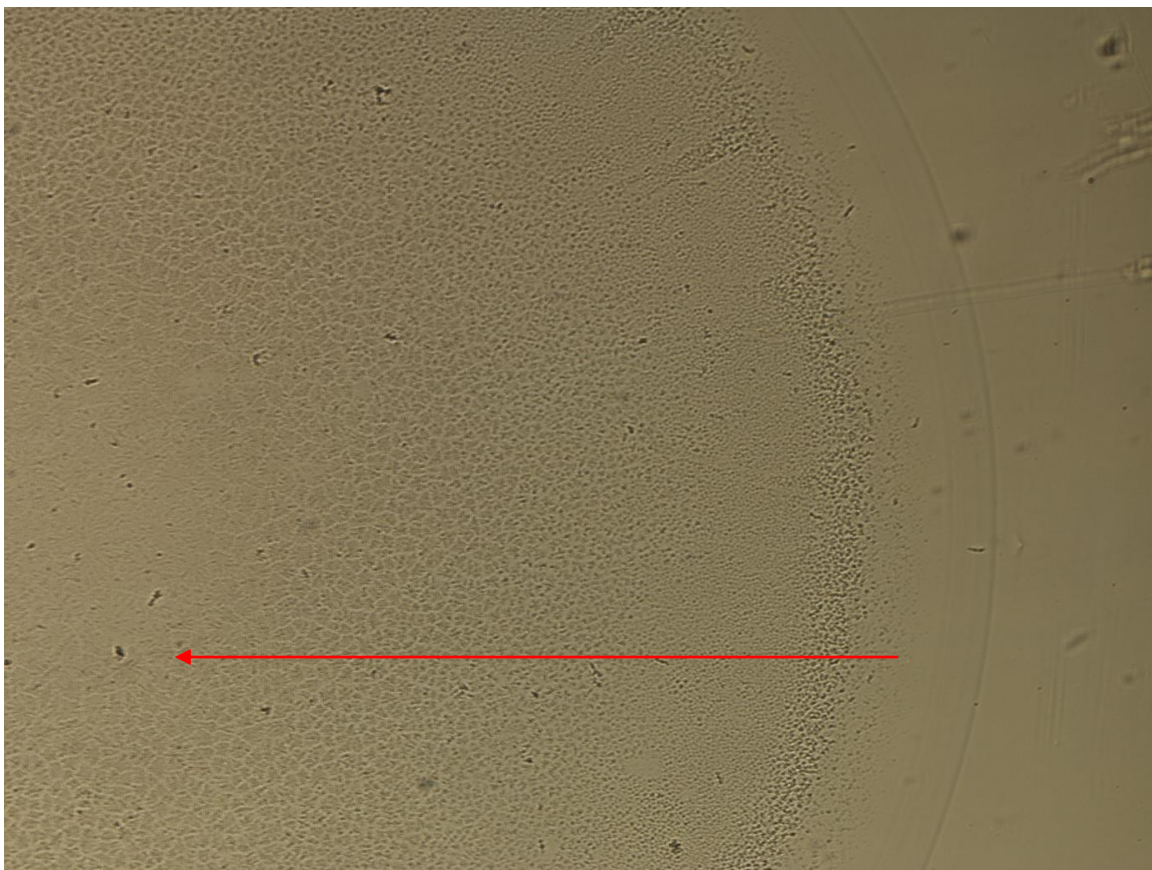

**Figure S12.** The optical image of S1.2 polymer on mica representing the different drop areas corresponding to different drying time, from the external circle to the center.

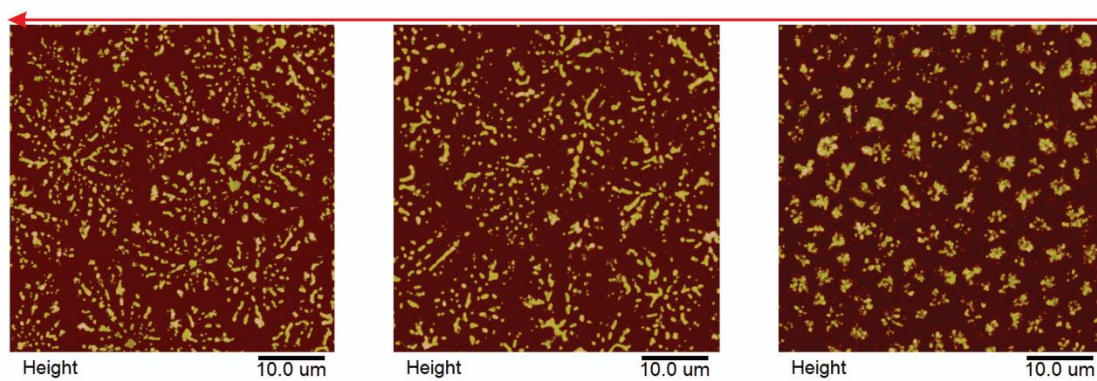

**Figure S13.** AFM images of S1.2 polymer representing the size difference of the polymer clusters from different areas of the drop.

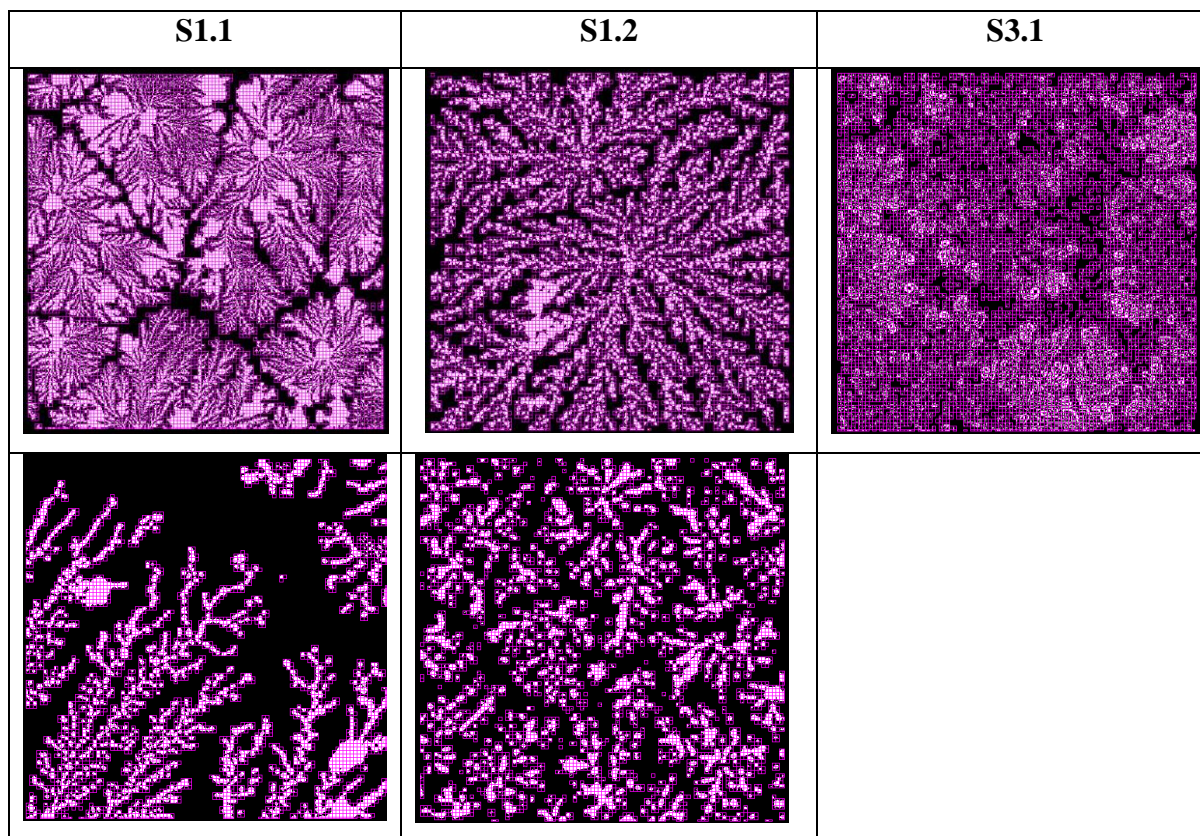

**Figure S14.** Fractal analysis was performed on AFM scans of S1.1, S1.2 and S3.1 using ImageJ software [1] (version 1.53k, National Institute of Health, Bethesda, MD, USA). Binarized 8-bit images were used for calculation of fractal dimension ( $D_f$ ) using FracLac plug-in [2] by Box-counting method with the following settings: number of positions for grids = 1, binary scale; graphics options ticked: regression and draw grids.

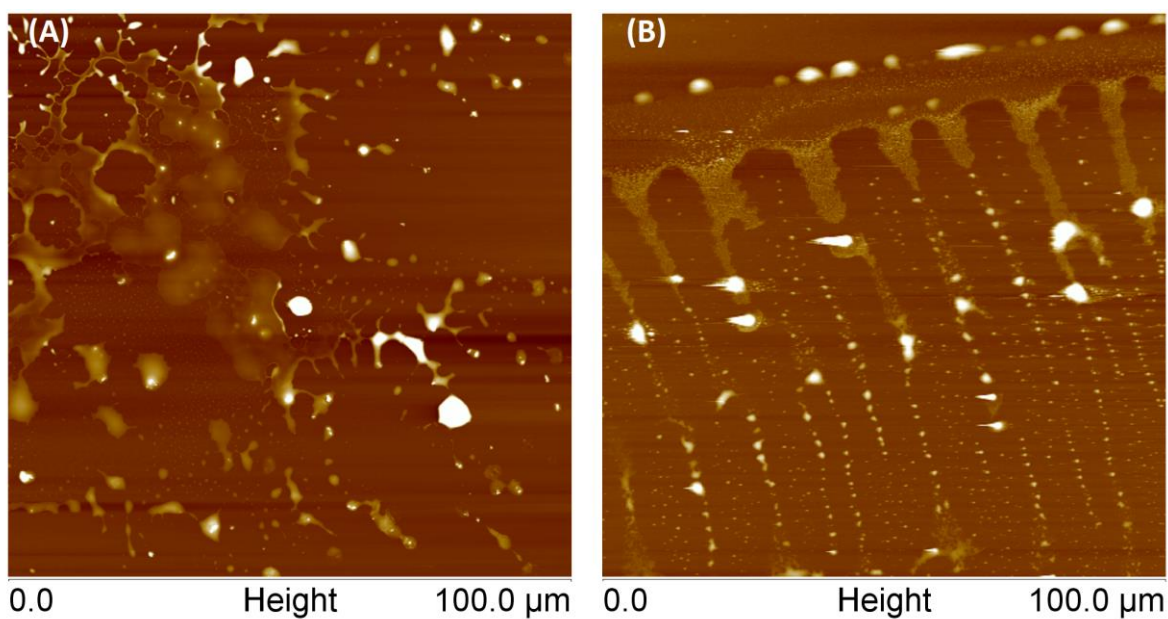

**Figure S15.** AFM images of S1.2 at initial concentration 0.001 mg/mL at room temperature (A) and at 50 °C (B).



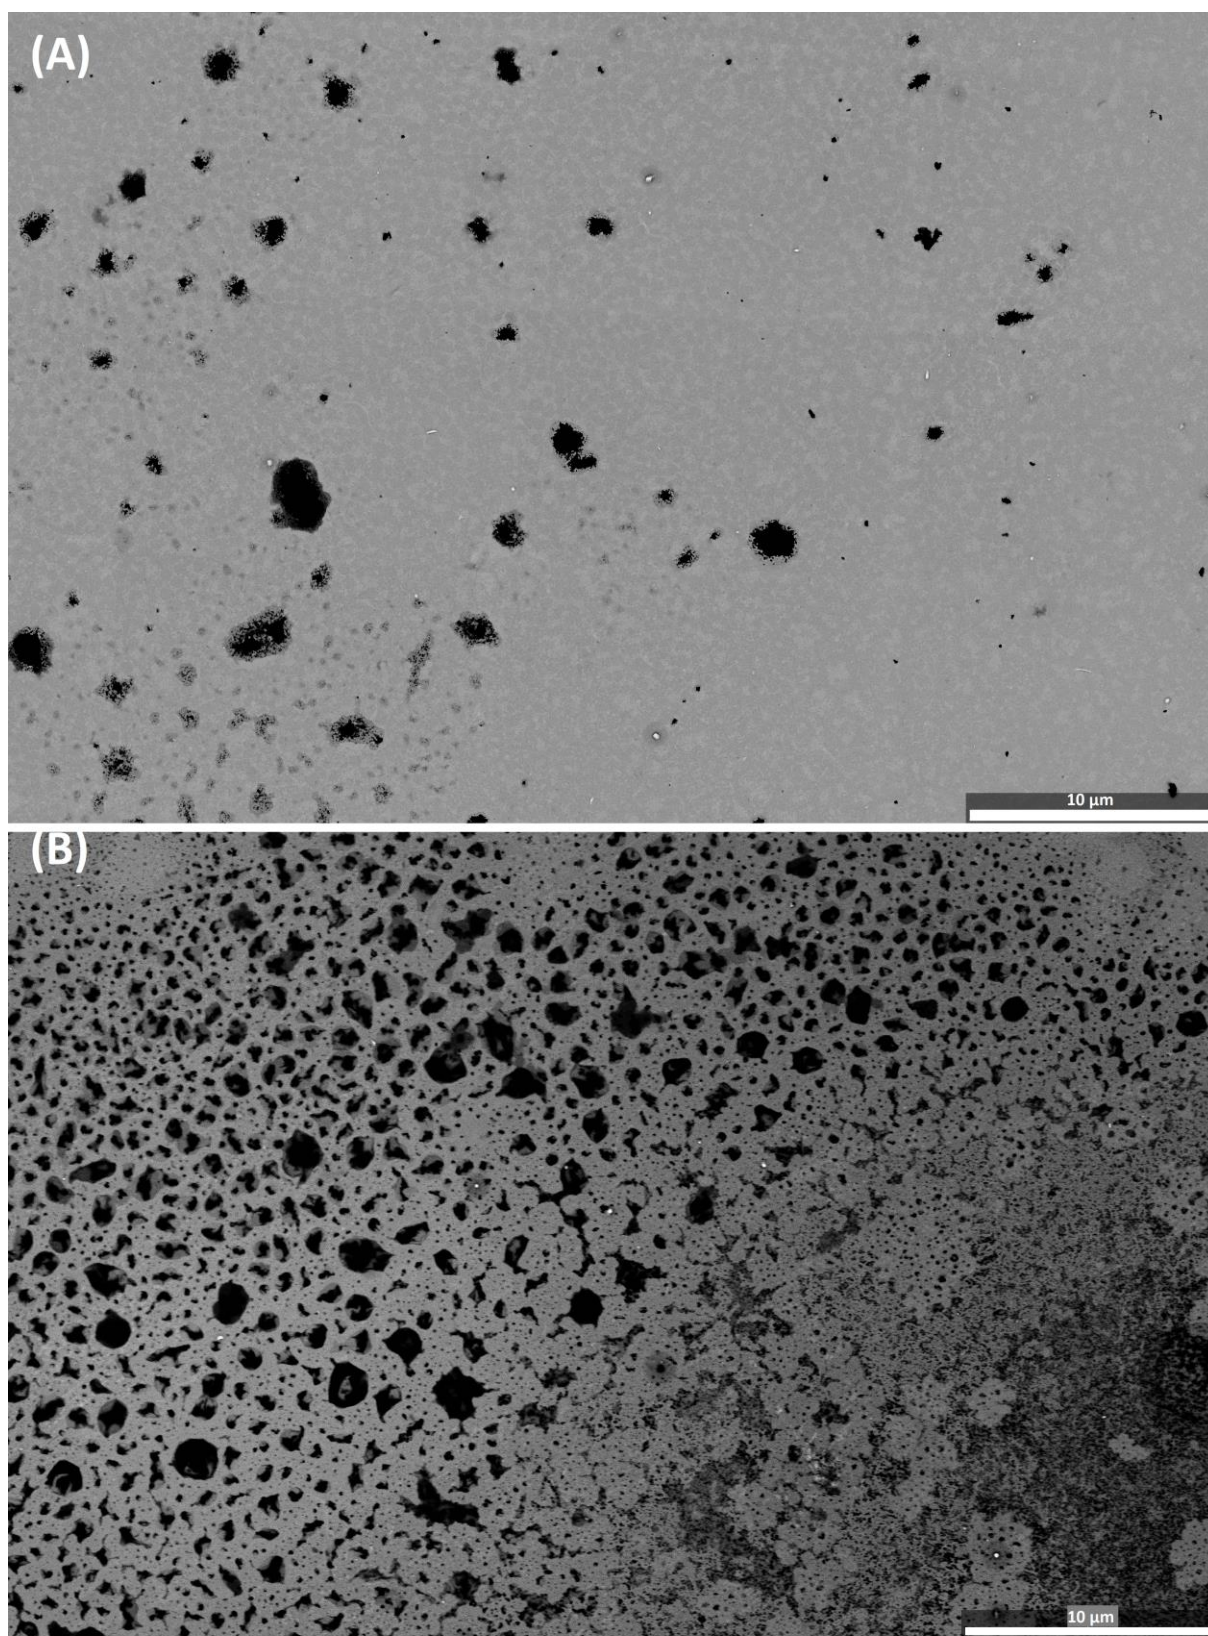

**Figure S16.** STEM images of S1.2 (A) and S3.1 (B) at initial concentration equal 0.001 mg/mL.

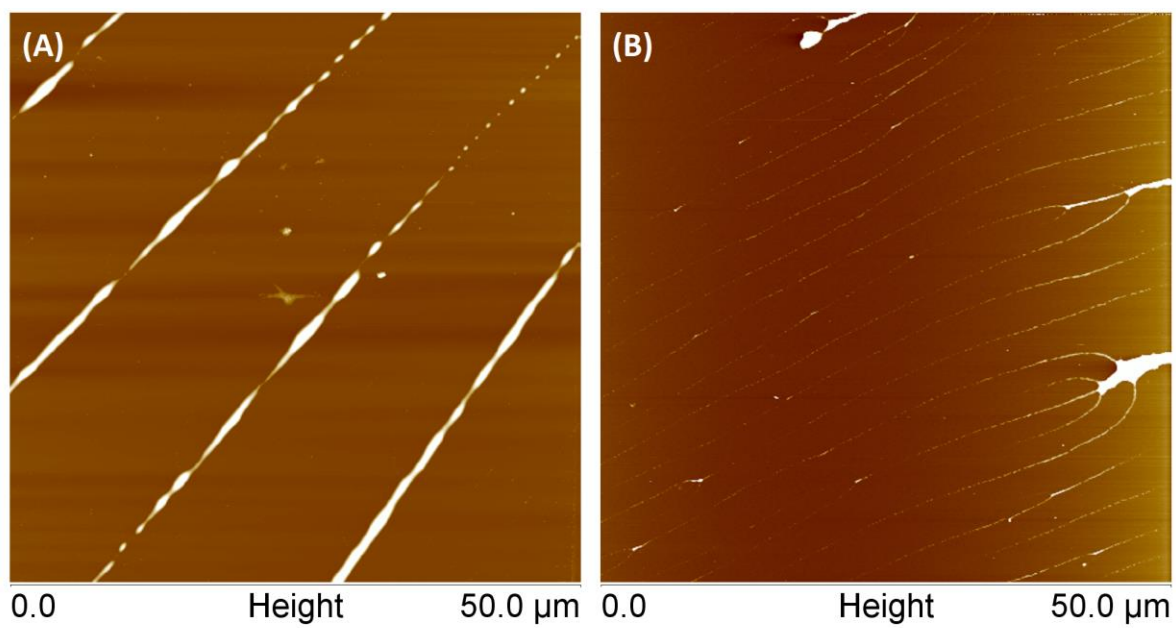

**Figure S17.** AFM images of S1.2 (A) and S3.1 (B) at 50 °C and initial concentration equal 0.01 mg/mL. The images were taken on the edge formed by a drying drop.



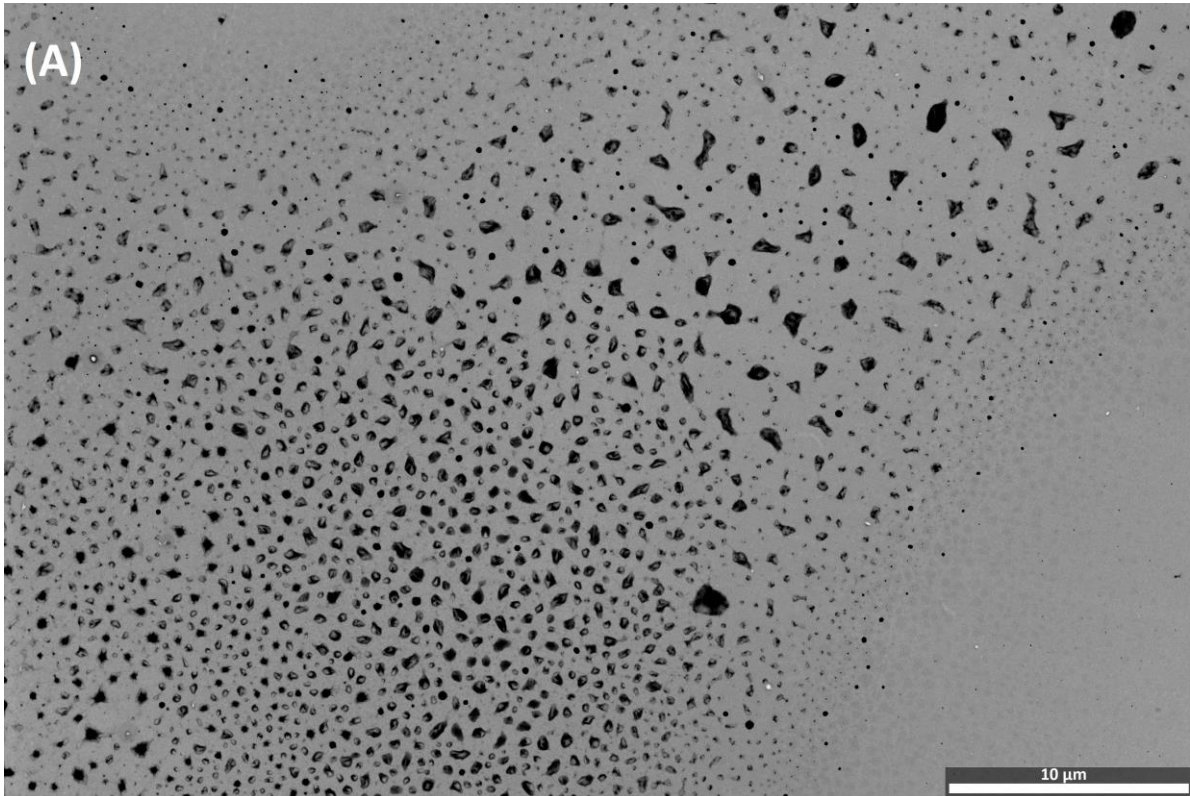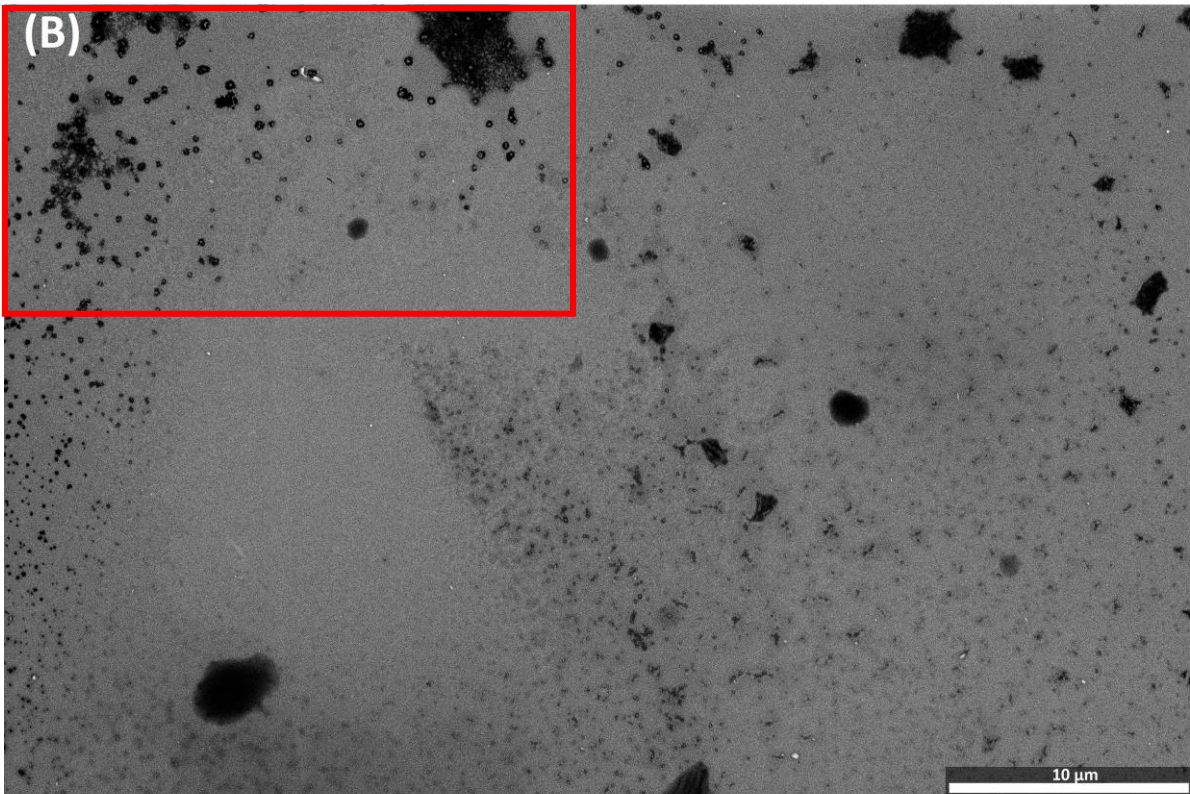

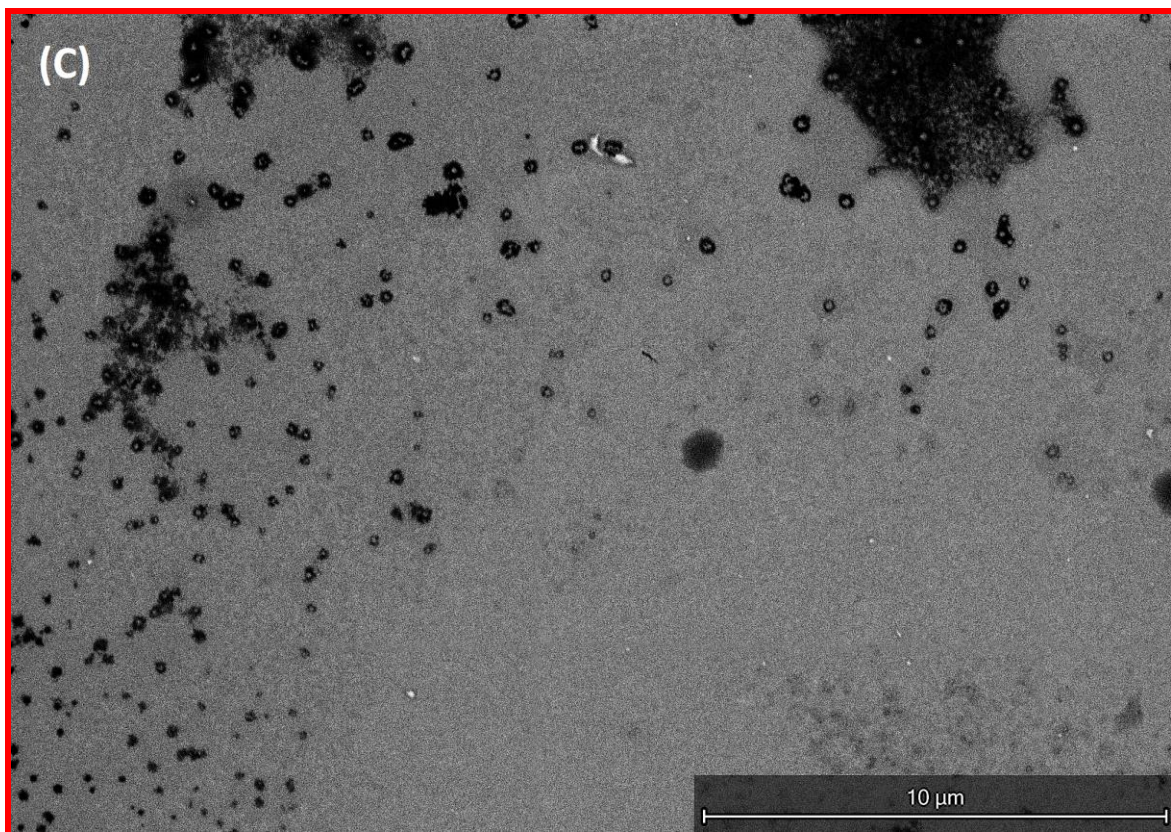

**Figure S18.** STEM images of S1.2 (A) and S3.1 (B, C) at 50 °C and initial concentration equal 0.01 mg/mL.

### 3. Literature

[1] Rasband, W.S., ImageJ, U. S. National Institutes of Health, Bethesda, Maryland, USA, <https://imagej.nih.gov/ij/> 1997-2018.

[2] Karperien, A., FracLac for ImageJ, <https://imagej.nih.gov/ij/plugins/fraclac/FLHelp/Introduction.htm>; 1999-2013.
